# Supplementary material for: Nonselective Cyclooxygenase Inhibition Retards Cyst Progression in a Murine Model of Autosomal Dominant Polycystic Kidney Disease
Source: PubMed Central journal article supplement — Int J Med Sci. 2019 Jan 1;16(1):180–8. doi: 10.7150/ijms.27719 (PMC6332488; doi:10.7150/ijms.27719), 2019-01-01

## Supplemental figure legends

Supplemental figure 1. Liver weight following 8mo treatment with vehicle or sulindac. Liver weight was significantly decreased in  $Pkd2^{WS25/-}$  mice treated with sulindac as compared to  $Pkd2^{WS25/-}$  mice fed control diet. (n=8 for every group,  $Pkd2^{WS25/-}$  vehicle vs. sulindac : \* $P<0.05$ ;  $Pkd2^{WS25/-}$  vehicle vs. control: \*\* $P<0.01$ )

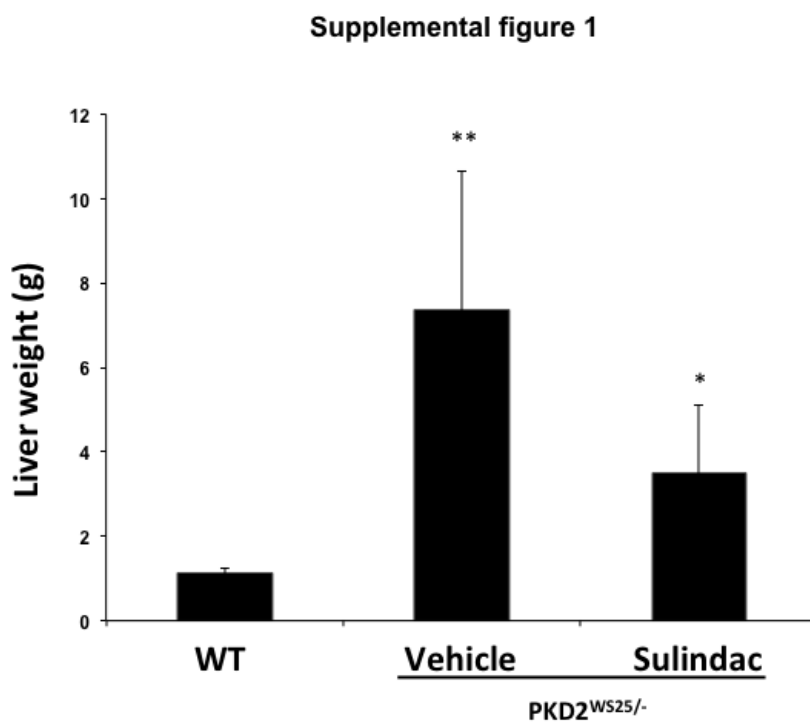

Supplement: ijmsv16p0180s1.pdf [file ijmsv16p0180s1.pdf]
